# Supplementary material for: Hydrogels modified with QHREDGS peptide support cardiomyocyte survival in vitro and after sub-cutaneous implantation
Source: Royal Society of Chemistry journal article supplement (doi:10.1039/c0sm00362j), 2010-01-01
Supplement: c0sm00362j.pdf [file c0sm00362j.pdf]

**Supplemental Figure 1.** Double staining for TUNEL and cardiac troponin I indicates less apoptotic nuclei in QHREDGS compared to the RGDS modified Az-chitosan.

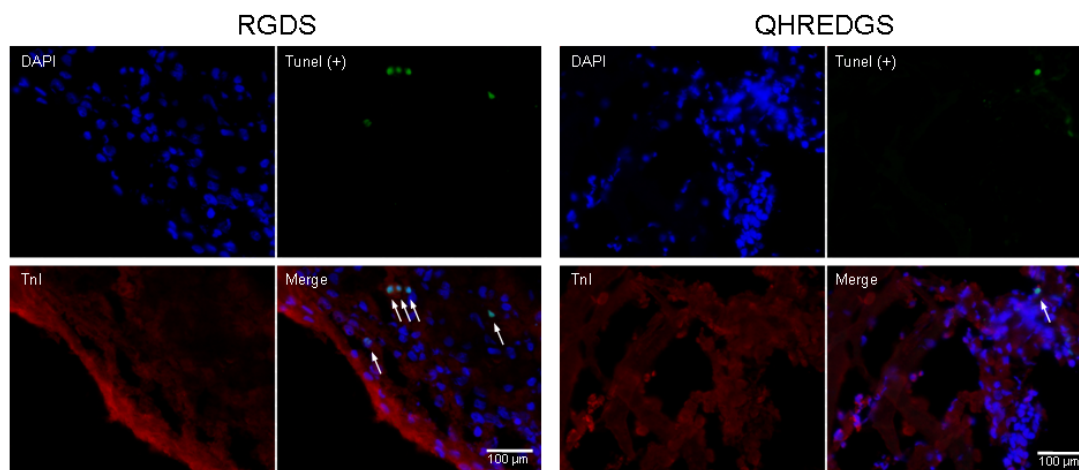

Supplemental Figure 1
